# Supplementary material
Source: publisher figshare collection journal article supplement (https://acs.figshare.com/ndownloader/files/24994709)
Supplement: Supplementary file 1 [file 24994709]

## Supporting Information

### **Amorphous Ni-Based Nanoparticles for Alkaline Oxygen Evolution**

Kevin M. Cole<sup>a,\*</sup>, Sagar Prabhudev<sup>b</sup>, Gianluigi A. Botton<sup>b</sup>, Donald W. Kirk<sup>c</sup>, Steven J. Thorpe<sup>a</sup>

<sup>a</sup> Department of Materials Science and Engineering, University of Toronto, Toronto, Ontario M5S 3E4, Canada

<sup>b</sup> Department of Materials Science and Engineering and Canadian Centre for Electron Microscopy, McMaster University, 1280 Main Street West, Hamilton, Ontario L8S 4M4, Canada

<sup>c</sup> Department of Chemical Engineering and Applied Chemistry, University of Toronto, Toronto, Ontario M5S 3E5, Canada

Corresponding author: E-mail: [kevin.cole@mail.utoronto.ca](mailto:kevin.cole@mail.utoronto.ca)

Table S1: List of materials used for synthesis and as standards for analysis

| Material                | Source            | Purity     | Particle Size        |
|-------------------------|-------------------|------------|----------------------|
| Ni                      | Alfa Aesar        | 99.9 wt %  | < 149 $\mu\text{m}$  |
| Co                      | Alfa Aesar        | 99.8 wt %  | < 149 $\mu\text{m}$  |
| Nb                      | Alfa Aesar        | 99.99 wt % | < 44 $\mu\text{m}$   |
| Y                       | Goodfellow        | 99.9 wt %  | <500 $\mu\text{m}^*$ |
| NiO                     | Fisher Scientific | 99.8 wt %  | ---                  |
| $\beta\text{-Ni(OH)}_2$ | Sigma Aldrich     | ---        | ---                  |
| $\beta\text{-NiOOH}$    | This work**       | ---        | ---                  |
| $\text{Co}_3\text{O}_4$ | Sigma Aldrich     | 99.5 wt %  | < 50 nm              |
| $\text{Co(OH)}_2$       | Sigma Aldrich     | 95 wt %    | ---                  |
| $\text{Y}_2\text{O}_3$  | This work***      | ---        | ---                  |
| $\text{Y(OH)}_3$        | Muse Chem         | 99.99 wt%  | ---                  |

\*Milled at room temperature to reduce the particle size to < 149  $\mu\text{m}$  prior to alloying

\*\*Synthesized by adding a solution of 47.5 g KOH and 11 mL  $\text{Br}_2$  in 500 mL of  $\text{H}_2\text{O}$  dropwise to 50 g of  $\text{Ni(NO}_3)_2 \cdot \text{H}_2\text{O}$  in 750 mL of  $\text{H}_2\text{O}$  at 100  $^\circ\text{C}$ . The sample was then rinsed with  $\text{H}_2\text{O}$ , centrifuged, filtered, and dried under vacuum for ca. 48 hours. The presence of  $\beta\text{-NiOOH}$  was verified using XRD.

\*\*\*Produced by oxidizing Y powder and verified using XRD

Table S2: Nominal and measured (ICP-OES) compositions for as-produced nanoparticles

| Material                                                                 |         | Ni (at %)      | Co (at %)     | Nb (at %)      | Y (at %)      |
|--------------------------------------------------------------------------|---------|----------------|---------------|----------------|---------------|
| Crystalline<br>$\text{Ni}_{95}\text{Co}_5$                               | Nominal | 95             | 5             | ---            | ---           |
|                                                                          | ICP-AES | $95.2 \pm 2.1$ | $4.8 \pm 0.3$ | ---            | ---           |
| Amorphous<br>$\text{Ni}_{79.2}\text{Nb}_{12.5}\text{Y}_{8.3}$            | Nominal | 79.2           | ---           | 12.5           | 8.3           |
|                                                                          | ICP-AES | $82.0 \pm 2.0$ | ---           | $10.8 \pm 2.6$ | $7.3 \pm 0.8$ |
| Amorphous<br>$\text{Ni}_{74.2}\text{Co}_5\text{Nb}_{12.5}\text{Y}_{8.3}$ | Nominal | 74.2           | 5             | 12.5           | 8.3           |
|                                                                          | ICP-AES | $73.4 \pm 2.1$ | $4.9 \pm 0.3$ | $12.1 \pm 2.8$ | $9.6 \pm 1.4$ |

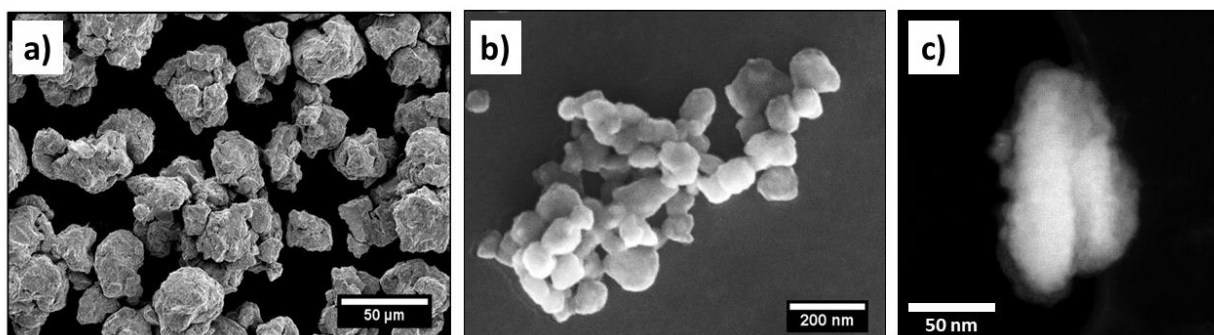

Figure S1: SEM images of amorphous  $\text{Ni}_{74.2}\text{Co}_5\text{Nb}_{12.5}\text{Y}_{8.3}$  particles after (a) cryomilling and (b) SA-HEBM, along with (c) TEM image of a single particle.

Table S3: Tafel slope, current density at  $\eta = 400$  mV, and  $\eta$  at  $j = 10 \mu\text{A cm}^{-2}_{\text{ECSA}}$  values for the OER of crystalline Ni,  $\text{Ni}_{95}\text{Co}_5$  and amorphous  $\text{Ni}_{79.2-x}\text{Co}_x\text{Nb}_{12.5}\text{Y}_{8.3}$  ( $x = 0$  and 5 at %) after anodically cycling 50 and 10000 times with a scan rate of  $50 \text{ mV s}^{-1}$  between 0.1 and 0.7  $V_{\text{Hg/HgO}}$ . Experiments were conducted in deaerated 1 M KOH at 30 °C. Values and error bars are based on a minimum of three tests.

| Material                                                              | Cycles | Tafel Slope (mV) | $j_{\eta = 400 \text{ mV}}$ ( $\mu\text{A cm}^{-2}_{\text{ECSA}}$ ) | $\eta_{j = 10 \mu\text{A cm}^{-2}_{\text{ECSA}}}$ (mV) |
|-----------------------------------------------------------------------|--------|------------------|---------------------------------------------------------------------|--------------------------------------------------------|
| Crystalline Ni                                                        | 50     | $59 \pm 8.2$     | $252 \pm 89.7$                                                      | $299 \pm 1.80$                                         |
|                                                                       | 10000  | $71 \pm 0.2$     | $169 \pm 44.4$                                                      | $276 \pm 13.4$                                         |
| Crystalline $\text{Ni}_{95}\text{Co}_5$                               | 50     | $49 \pm 1.0$     | $852 \pm 180$                                                       | $235 \pm 3.50$                                         |
|                                                                       | 10000  | $81 \pm 5.9$     | $93.3 \pm 43.6$                                                     | $297 \pm 22.1$                                         |
| Amorphous $\text{Ni}_{79.2}\text{Nb}_{12.5}\text{Y}_{8.3}$            | 50     | $50 \pm 3.8$     | $299 \pm 18.8$                                                      | $281 \pm 17.0$                                         |
|                                                                       | 10000  | $73 \pm 2.7$     | $76.1 \pm 18.1$                                                     | $288 \pm 12.5$                                         |
| Amorphous $\text{Ni}_{74.2}\text{Co}_5\text{Nb}_{12.5}\text{Y}_{8.3}$ | 50     | $71 \pm 3.1$     | $287 \pm 48.1$                                                      | $267 \pm 17.0$                                         |
|                                                                       | 10000  | $58 \pm 1.3$     | $289 \pm 73.3$                                                      | $265 \pm 18.1$                                         |

### X-ray Photoelectron Spectroscopy (XPS) Analysis

Tables S4 (Ni 2p) and S5 (O 1 s) were used to aid with the identification of surface species produced on crystalline  $\text{Ni}_{95}\text{Co}_5$ , amorphous  $\text{Ni}_{79.2}\text{Nb}_{12.5}\text{Y}_{8.3}$ , and amorphous  $\text{Ni}_{74.2}\text{Co}_5\text{Nb}_{12.5}\text{Y}_{8.3}$  after anodic cycling 50 times. The standards produced and tested within this report were confirmed to be in good agreement with literature (NIST X-ray Photoelectron Spectroscopy Database, NIST Standard Reference Database Number 20, National Institute of Standards and Technology, Gaithersburg MD, 20899 (2000), doi:10.18434/T4T88K).

Table S4: Ni 2p<sub>3/2</sub> XPS fitting parameters for alloys after anodic cycling and relevant standards

| Material                                                              | Binding Energy (eV) | Peak Width FWHM (eV) | $\Delta\text{split}$ (eV) | $\Delta\text{sat}$ (eV) | Reference |
|-----------------------------------------------------------------------|---------------------|----------------------|---------------------------|-------------------------|-----------|
| Crystalline $\text{Ni}_{95}\text{Co}_5$                               | 852.1, 854.6, 855.1 | 1.57, 1.76, 2.83     | 18.4, 17.6, 17.8          | 6.10                    | This work |
| Amorphous $\text{Ni}_{79.2}\text{Nb}_{12.5}\text{Y}_{8.3}$            | 851.9, 855.0        | 1.24, 2.70           | 17.3, 17.5                | 5.88                    | This work |
| Amorphous $\text{Ni}_{74.2}\text{Co}_5\text{Nb}_{12.5}\text{Y}_{8.3}$ | 852.0, 854.9        | 1.13, 3.03           | 17.2, 17.5                | 5.95                    | This work |
| Ni                                                                    | 852.5               | 1.08                 | 17.3                      | 5.65                    | This work |
| NiO                                                                   | 854.1, 855.7        | 0.98, 3.30           | 17.3, 17.3                | 6.30, 7.10              | This work |
| $\beta\text{-Ni}(\text{OH})_2$                                        | 855.4, 856.2        | 2.06, 3.13           | 17.4, 18.0                | 5.38, 6.10              | This work |
| $\beta\text{-NiOOH}$                                                  | 854.8, 856.0        | 1.33, 2.05           | 17.4                      | 5.11                    | This work |
| $\gamma\text{-NiOOH}$                                                 | 855.3               | 2.42                 | 17.5, 18.3                | 5.80                    | 1         |

$\Delta\text{split}$  is the difference between Ni 2p<sub>3/2</sub> and Ni 2p<sub>1/2</sub> peaks

$\Delta\text{sat}$  is the difference between Ni 2p<sub>3/2</sub> and Ni 2p<sub>3/2</sub> satellite peak

Table S5: O 1 s XPS fitting parameters for alloys after anodic cycling and relevant standards

| Material                                                                            | Binding Energy(eV)         | Peak Width FWHM (eV)   | Reference |
|-------------------------------------------------------------------------------------|----------------------------|------------------------|-----------|
| Crystalline<br>Ni <sub>95</sub> Co <sub>5</sub>                                     | 528.9, 530.8, 533.1        | 1.37, 1.85, 1.98       | This work |
| Amorphous<br>Ni <sub>79.2</sub> Nb <sub>12.5</sub> Y <sub>8.3</sub>                 | 529.2, 530.6, 532.7        | 1.31, 1.68, 1.49       | This work |
| Amorphous<br>Ni <sub>74.2</sub> Co <sub>5</sub> Nb <sub>12.5</sub> Y <sub>8.3</sub> | 529.3, 530.7, 531.4        | 1.25, 1.61, 2.30       | This work |
| NiO                                                                                 | 529.7, 531.2, 531.3        | 0.88, 3.19, 2.14       | This work |
| $\beta$ -Ni(OH) <sub>2</sub>                                                        | 530.7, 530.9               | 1.39, 2.14             | This work |
| $\beta$ -NiOOH                                                                      | 529.3, 530.7, 532.1        | 0.87, 1.74, 2.68       | This work |
| $\gamma$ -NiOOH                                                                     | 528.9, 530.8, 532.6        | 1.27, 1.92, 2.18       | 1         |
| Co <sub>3</sub> O <sub>4</sub>                                                      | 529.4, 529.8, 531.2, 532.5 | 1.49, 0.92, 1.86, 2.36 | This work |
| Co(OH) <sub>2</sub>                                                                 | 531.2, 532.7               | 1.55, 1.85             | This work |
| CoO <sub>2</sub>                                                                    | 528.7, 531.2, 533.0        | ---                    | 2         |
| Y <sub>2</sub> O <sub>3</sub>                                                       | 529.2, 531.5, 533.3        | 1.45, 2.01, 1.99       | This work |
| Y(OH) <sub>3</sub>                                                                  | 531.4, 532.4, 533.2        | 1.72, 1.76, 2.28       | 3         |

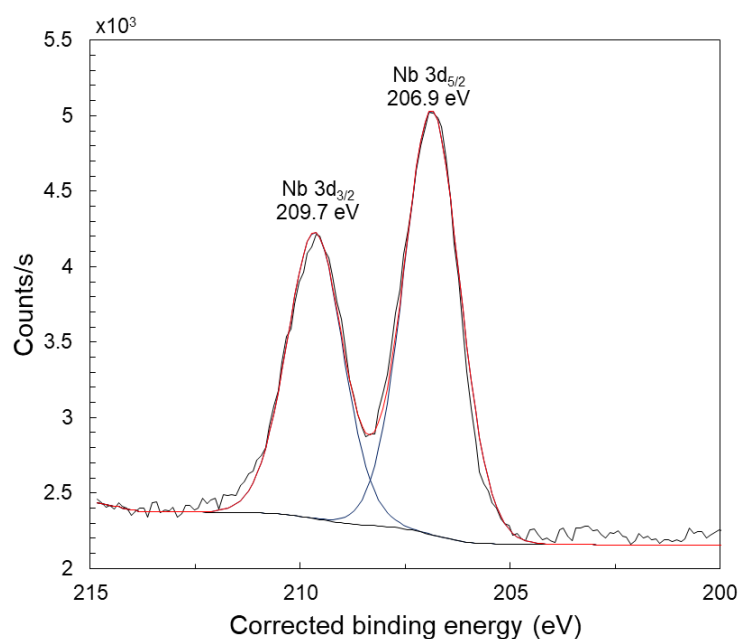

Figure S2: Nb 3d XPS spectra corresponding to the presence of Nb<sub>2</sub>O<sub>5</sub> on the surface of amorphous Ni<sub>74.2</sub>Co<sub>5</sub>Nb<sub>12.5</sub>Y<sub>8.3</sub> prior to anodic cycling

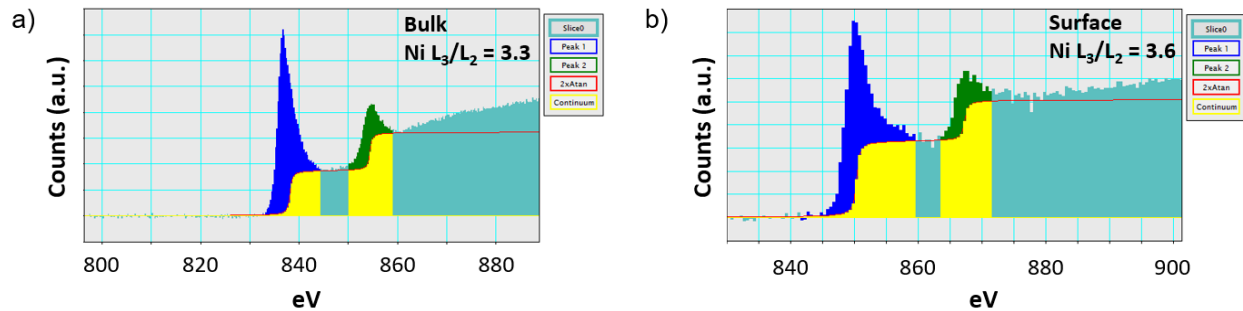

Figure S3: Ni  $L_3/L_2$  white-line intensity ratios from electron energy-loss near-edge spectroscopy for pristine amorphous  $Ni_{74.2}Co_5Nb_{12.5}Y_{8.3}$  a) bulk and b) surface

Table S6: Comparison of  $L_3/L_2$  white-line intensity ratios for pristine  $Ni_{74.2}Co_5Nb_{12.5}Y_{8.3}$  bulk and surface with Ni, NiO and  $Ni(OH)_2$  references

| Sample                                  | Estimated $L_3/L_2$ ratios | Reference |
|-----------------------------------------|----------------------------|-----------|
| $Ni_{74.2}Co_5Nb_{12.5}Y_{8.3}$ bulk    | 3.3                        | This work |
| $Ni_{74.2}Co_5Nb_{12.5}Y_{8.3}$ surface | 3.6                        | This work |
| Ni reference                            | 3.3                        | 4         |
| NiO reference                           | 3.8                        | 5         |
| NiO reference                           | 4.0                        | 6         |
| $Ni(OH)_2$ reference                    | 3.6                        | 5         |

Table S7: Quantification of Nb and Y elemental edges in EELS for surface and core regions in pristine, 1000 cycled, 5000 cycled, and submerged  $Ni_{74.2}Co_5Nb_{12.5}Y_{8.3}$  nanoparticles.

| Area    | Sample      | Nb Concentration (at%) | Y Concentration (at%) |
|---------|-------------|------------------------|-----------------------|
| Core    | Pristine    | 45                     | 55                    |
|         | Submerged   | 39                     | 61                    |
|         | 1000 Cycles | 41                     | 59                    |
|         | 5000 Cycles | 48                     | 52                    |
| Surface | Pristine    | 69                     | 31                    |
|         | Submerged   | 68                     | 32                    |
|         | 1000 Cycles | 25                     | 75                    |
|         | 5000 Cycles | 0                      | 100                   |

## References

1. A. N. Mansour and C. A. Melendres, *Surf. Sci. Spectra* **3**, 271 (1994).
2. L. Dahéron, R. Dedryvère, H. Martinez, M. Ménétrier, C. Denage, C. Delmas, and D. Gonbeau, *Chem. Mater.* **20**, 583 (2008).
3. K. M. Cole, D. W. Kirk, and S. J. Thorpe, *Surf. Sci. Spectra* **27**, (2020).
4. P. A. Van Aken and B. Liebscher, *Phys. Chem. Miner.* **29**, 188 (2002).
5. M. Hao, S. Garbarino, S. Prabhudev, T. Borsboom-Hanson, G. A. Botton, D. A. Harrington, and D. Guay, *J. Phys. Chem. C* **123**, 1082 (2019).
6. R. D. Leapman, L. A. Grunes, and P. L. Fejes, *Phys. Rev. B* **26**, 614 (1982).
